# Supplementary material
Source: publisher site journal article supplement (https://www.dovepress.com/article/245826)
Supplement: Supplementary file 1 [file get_supplementary_file.php]

# Supplementary material

**Figure S1**


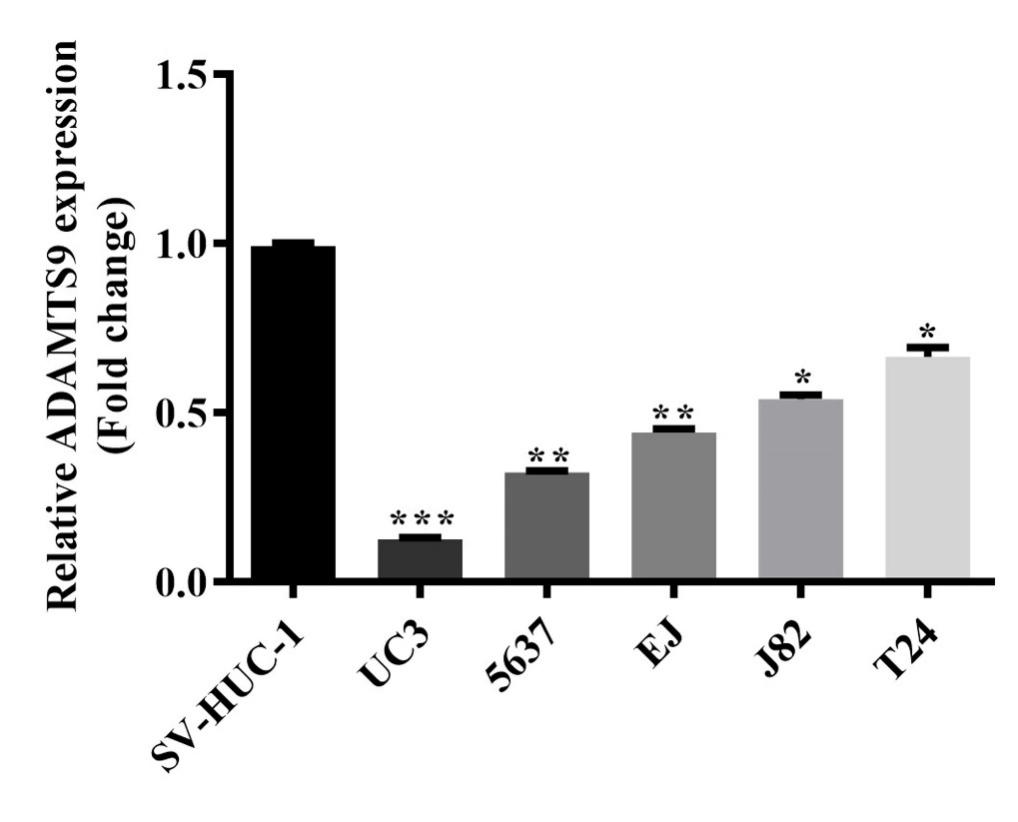


**Figure S1.** **Downregulation of ADAMTS9 was identified in bladder tumor cells using qPCR**

**Notes**:qPCR assays were conducted to exam the ADAMTS9 expression in one normal cell line SV-HUC-1 and five bladder tumor cell lines (UC3, 5637, J82, T24, and EJ). We found that compared to normal cell line SV-HUC-1, the expression of ADAMTS9 was downregulated in UC3, 5637, J82, T24, and EJ cell lines, especially in UC3 and 5637 cells, *, P < 0.05, **, P < 0.01; *** P < 0.001

**Abbreviations**: ADAMTS9, ADAM metallopeptidase with thrombospondin type 1 motif, 9; q-PCR, quantitative PCR

**Figure S2**


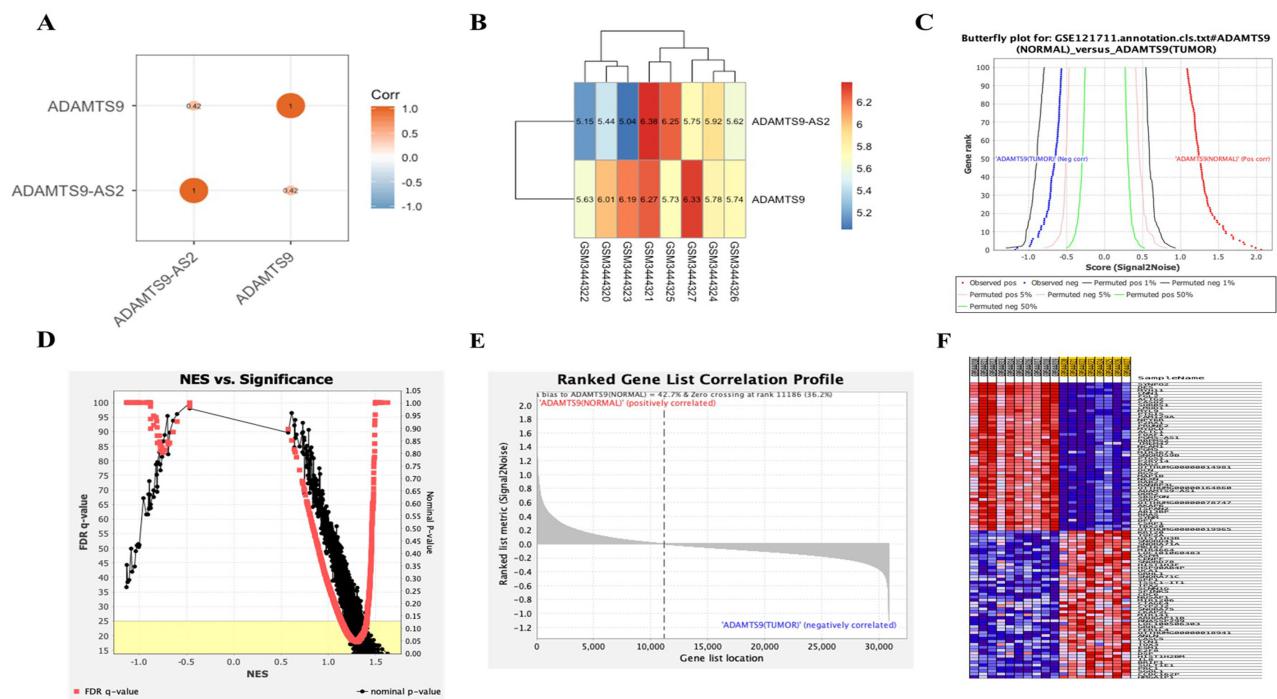


**Figure S2. The** **correlation analysis** **between ADAMTS9-AS2 and ADAMTS9 using GEO**

**Notes:** (**A**) From the GEO analysis results, red represents positive correlation, which indicated that ADAMTS9-AS2 and ADAMTS9 had a weak positive correlation, and the correlation coefficient is 0.42. (**B**) The heatmap from bladder tumor dataset GSE121711, we obtained the matrix of ADAMTS9-AS2 and ADAMTS9 expression value, which showed the difference in expression between them. (**C**) GSEA butterfly plot showed observed association between gene rank and ranking metric score, as well as permuted (1%, 5%, 50%) positive and negative association. (**D**) GSE121711 dataset, in which genes with nominal p-value < 0.05 and FDR q-value < 0.25 were further selected to obtain relatively significant data. (**E**) Ranked gene list showed the top 100 genes in the correlation profile. (**F**) The heatmap showed that the first 100 genes are significant differences in expression between tumor and normal samples.

**Abbreviations**: ADAMTS9, ADAM metallopeptidase with thrombospondin type 1 motif, 9, ADAMTS9-AS2, ADAMTS9 antisense RNA 2; GEO, Gene Expression Omnibus; GSEA, Gene Set Enrichment Analysis; FDR, false discovery rate
